# Supplementary material for: Associations between Nine Polymorphisms in EXO1 and Cancer Susceptibility: A Systematic Review and Meta-Analysis of 39 Case-control Studies
Source: PubMed Central journal article supplement (PMC4937237; doi:10.1038/srep29270), 2016-07-08
Supplement: srep29270-s1.pdf [file srep29270-s1.pdf]

**Associations between Nine Polymorphisms in EXO1 and Cancer Susceptibility:**

*A Systematic Review and Meta-Analysis of 39 Case-control Studies*

Meng Zhang<sup>1,2</sup>, Duran Zhao<sup>1,2</sup>, Cunye Yan<sup>1,2</sup>, Li Zhang<sup>1,2\*</sup>, Chaozhao Liang<sup>1,2\*</sup>

<sup>1</sup> Department of Urology, the First Affiliated Hospital of Anhui Medical University, Hefei, China

<sup>2</sup> Institute of Urology, Anhui Medical University, Hefei, China

**Correspondence:** Chaozhao Liang ([liang\\_chaozhao@163.com](mailto:liang_chaozhao@163.com)); Li Zhang ([lzhang\\_nanomed@163.com](mailto:lzhang_nanomed@163.com))

**Department:** Urology

**Location:** 218 Jixi Road, Shushan District, Hefei, China.

**Tel.:** +86-551-62923440

**Fax:** +86-551-63633742

## **Supplementary Information**

**Supplementary table 1.** Methodological quality of the included studies according to the Newcastle-Ottawa Scale.

**Supplementary table 2.** Results of meta-analysis for polymorphisms in and cancer susceptibility.

**Supplementary table 3.** Details of the sensitivity analyses for the polymorphisms in EXO1 and cancer risk.

**Supplementary table 4.** *P* values of the Egger's test for the polymorphisms in EXO1.

**Supplementary table 5.** Details of the linkage disequilibrium analysis for EXO1 polymorphisms in populations from 1000 genomes Phase 3.

**Supplementary figure 1.** Begg's funnel plot for publication bias test under EXO1 rs1047840 polymorphism

(allelic comparison G vs. A). The x-axis is  $\log(\text{OR})$ , and the y-axis is natural logarithm of OR. The horizontal line in the figure represents the overall estimated  $\log(\text{OR})$ . The two diagonal lines indicate the pseudo 95% confidence limits of the effect estimate.  $\log(\text{OR}) = \log\text{-transformed OR}$ , OR=odds ratio.

**Supplementary table 1.** Methodological quality of the included studies according to the Newcastle-Ottawa Scale

| Variants                       | Author                         | Adequacy of Case Definition | Representativeness of the Cases | Selection of Controls | Definition of Controls | Comparability Cases/Controls | Ascertainment of Exposure | Same Method of Ascertainment | Non-response rate |
|--------------------------------|--------------------------------|-----------------------------|---------------------------------|-----------------------|------------------------|------------------------------|---------------------------|------------------------------|-------------------|
| rs1047840                      | Kabziński <i>et al.</i>        | *                           | *                               | NA                    | *                      | *                            | *                         | *                            | NA                |
|                                | Nogueira <i>et al.</i>         | *                           | *                               | NA                    | *                      | **                           | *                         | *                            | NA                |
|                                | Tang <i>et al.</i>             |                             | *                               | *                     | *                      | *                            | **                        | *                            | NA                |
|                                | Luo <i>et al.</i>              | *                           | *                               | NA                    | *                      | *                            | *                         | *                            | NA                |
|                                | Tsai <i>et al.</i>             | *                           | *                               | NA                    | *                      | *                            | *                         | *                            | NA                |
|                                | Wang <i>et al.</i>             | *                           | *                               | NA                    | *                      | **                           | *                         | *                            | NA                |
|                                | Bau <i>et al.</i>              | *                           | *                               | NA                    | *                      | **                           | *                         | *                            | NA                |
|                                | Jin <i>et al.</i>              | *                           | *                               | *                     | *                      | **                           | *                         | *                            | NA                |
|                                | Zienolddiny <i>et al.</i>      | *                           | *                               | *                     | *                      | **                           | *                         | *                            | NA                |
|                                | Hsu <i>et al.</i>              | *                           | *                               | NA                    | *                      | **                           | *                         | *                            | NA                |
|                                | Bayram <i>et al.</i>           | *                           | *                               | NA                    | *                      | *                            | *                         | *                            | NA                |
|                                | Chang <i>et al.</i>            | *                           | *                               | *                     | *                      | **                           | *                         | *                            | NA                |
| Ibarrola-Villava <i>et al.</i> | *                              | *                           | *                               | *                     | *                      | *                            | *                         | NA                           |                   |
| rs1776148                      | Bau <i>et al.</i>              | *                           | *                               | NA                    | *                      | **                           | *                         | *                            | NA                |
|                                | Wang <i>et al.</i>             | *                           | *                               | NA                    | *                      | **                           | *                         | *                            | NA                |
|                                | Tsai <i>et al.</i>             | *                           | *                               | NA                    | *                      | *                            | *                         | *                            | NA                |
|                                | Chang <i>et al.</i>            | *                           | *                               | *                     | *                      | **                           | *                         | *                            | NA                |
|                                | Ibarrola-Villava <i>et al.</i> | *                           | *                               | *                     | *                      | *                            | *                         | *                            | NA                |
| Hsu <i>et al.</i>              | *                              | *                           | NA                              | *                     | **                     | *                            | *                         | NA                           |                   |
| rs9350                         | Haghighi <i>et al.</i>         | NA                          | *                               | NA                    | *                      | NA                           | NA                        | *                            | NA                |

|            |                                |   |   |    |   |    |   |   |    |
|------------|--------------------------------|---|---|----|---|----|---|---|----|
|            | Bau <i>et al.</i>              | * | * | NA | * | ** | * | * | NA |
|            | Wang <i>et al.</i>             | * | * | NA | * | ** | * | * | NA |
|            | Tsai <i>et al.</i>             | * | * | NA | * | *  | * | * | NA |
|            | Ibarrola-Villava <i>et al.</i> | * | * | *  | * | *  | * | * | NA |
|            | Hsu <i>et al.</i>              | * | * | NA | * | ** | * | * | NA |
| rs851797   | Bau <i>et al.</i>              | * | * | NA | * | ** | * | * | NA |
|            | Wang <i>et al.</i>             | * | * | NA | * | ** | * | * | NA |
|            | Tsai <i>et al.</i>             | * | * | NA | * | *  | * | * | NA |
|            | Hsu <i>et al.</i>              | * | * | NA | * | ** | * | * | NA |
| rs3754093  | Bau <i>et al.</i>              | * | * | NA | * | ** | * | * | NA |
|            | Wang <i>et al.</i>             | * | * | NA | * | ** | * | * | NA |
|            | Tsai <i>et al.</i>             | * | * | NA | * | *  | * | * | NA |
|            | Hsu <i>et al.</i>              | * | * | NA | * | ** | * | * | NA |
| rs1776177  | Bau <i>et al.</i>              | * | * | NA | * | ** | * | * | NA |
|            | Wang <i>et al.</i>             | * | * | NA | * | ** | * | * | NA |
|            | Tsai <i>et al.</i>             | * | * | NA | * | *  | * | * | NA |
|            | Hsu <i>et al.</i>              | * | * | NA | * | ** | * | * | NA |
| rs10802996 | Luo <i>et al.</i>              | * | * | NA | * | *  | * | * | NA |
|            | Bau <i>et al.</i>              | * | * | NA | * | ** | * | * | NA |
|            | Wang <i>et al.</i>             | * | * | NA | * | ** | * | * | NA |
|            | Tsai <i>et al.</i>             | * | * | NA | * | *  | * | * | NA |
|            | Hsu <i>et al.</i>              | * | * | NA | * | ** | * | * | NA |
| rs1635517  | Bau <i>et al.</i>              | * | * | NA | * | ** | * | * | NA |
|            | Wang <i>et al.</i>             | * | * | NA | * | ** | * | * | NA |

|           |                    |   |   |    |   |    |   |   |    |
|-----------|--------------------|---|---|----|---|----|---|---|----|
|           | Tsai <i>et al.</i> | * | * | NA | * | *  | * | * | NA |
|           | Hsu <i>et al.</i>  | * | * | NA | * | ** | * | * | NA |
| rs1635498 | Bau <i>et al.</i>  | * | * | NA | * | ** | * | * | NA |
|           | Wang <i>et al.</i> | * | * | NA | * | ** | * | * | NA |
|           | Tsai <i>et al.</i> | * | * | NA | * | *  | * | * | NA |
|           | Hsu <i>et al.</i>  | * | * | NA | * | ** | * | * | NA |

This table identifies 'high' quality choices with a 'star'. A study can be awarded a maximum of 1 star for each numbered item within the Selection and Exposure categories. A maximum of 2 stars can be given for Comparability. \*, Yes; NA, not applicable. ([http://www.ohri.ca/programs/clinical\\_epidemiology/oxford.htm](http://www.ohri.ca/programs/clinical_epidemiology/oxford.htm)).

**Supplementary table 2.** Results of meta-analysis for polymorphisms in and cancer susceptibility.

| <b>Polymorphisms</b> | <b>Comparison</b> | <b>Subgroup</b> | <b>N</b> | <b><i>P<sub>H</sub></i></b> | <b><i>P<sub>Z</sub></i></b> | <b>Random</b>       | <b>Fixed</b>        |
|----------------------|-------------------|-----------------|----------|-----------------------------|-----------------------------|---------------------|---------------------|
| rs1635498            | B VS. A           | Overall         | 4        | 0.983                       | <b>0.000</b>                | 7.965 (6.924-9.163) | 7.967 (6.926-9.164) |
|                      | BB VS. AA         | Overall         | 4        | 0.811                       | 0.671                       | 1.103 (0.692-1.759) | 1.106 (0.696-1.758) |
|                      | BA VS. AA         | Overall         | 4        | 0.934                       | 0.313                       | 1.071 (0.937-1.223) | 1.071 (0.937-1.223) |
|                      | BA+BB VS.AA       | Overall         | 4        | 0.879                       | 0.289                       | 1.073 (0.942-1.222) | 1.073 (0.942-1.222) |
|                      | BB VS.BA+AA       | Overall         | 4        | 0.827                       | 0.724                       | 1.085 (0.681-1.728) | 1.087 (0.684-1.726) |
| rs1635517            | B VS. A           | Overall         | 4        | 0.939                       | 0.019                       | 1.128 (1.020-1.247) | 1.128 (1.020-1.247) |
|                      | BB VS. AA         | Overall         | 4        | 0.480                       | 0.102                       | 0.800 (0.610-1.048) | 0.799 (0.610-1.045) |
|                      | BA VS. AA         | Overall         | 4        | 0.677                       | 0.564                       | 0.923 (0.699-1.218) | 0.922 (0.699-1.216) |
|                      | BA+BB VS.AA       | Overall         | 4        | 0.534                       | 0.199                       | 0.841 (0.644-1.099) | 0.840 (0.644-1.096) |
|                      | BB VS.BA+AA       | Overall         | 4        | 0.752                       | 0.010                       | 0.862 (0.769-0.966) | 0.862 (0.769-0.966) |
| rs3754093            | B VS. A           | Overall         | 4        | 0.895                       | <b>0.000</b>                | 2.976 (2.711-3.268) | 2.976 (2.711-3.268) |
|                      | BB VS. AA         | Overall         | 4        | 0.651                       | 0.011                       | 1.256 (1.054-1.497) | 1.257 (1.055-1.497) |
|                      | BA VS. AA         | Overall         | 4        | 0.995                       | 0.128                       | 1.097 (0.974-1.237) | 1.097 (0.974-1.237) |
|                      | BA+BB VS.AA       | Overall         | 4        | 0.979                       | 0.033                       | 1.132 (1.010-1.267) | 1.132 (1.010-1.267) |
|                      | BB VS.BA+AA       | Overall         | 4        | 0.574                       | 0.031                       | 1.196 (1.016-1.409) | 1.197 (1.017-1.409) |
| rs851797             | B VS. A           | Overall         | 4        | 0.995                       | <b>0.000</b>                | 1.841 (1.686-2.009) | 1.841 (1.686-2.009) |
|                      | BB VS. AA         | Overall         | 4        | 0.997                       | 0.746                       | 0.974 (0.831-1.142) | 0.974 (0.831-1.142) |
|                      | BA VS. AA         | Overall         | 4        | 0.989                       | 0.394                       | 0.938 (0.811-1.086) | 0.938 (0.811-1.086) |
|                      | BA+BB VS.AA       | Overall         | 4        | 0.999                       | 0.482                       | 0.952 (0.829-1.092) | 0.952 (0.829-1.092) |
|                      | BB VS.BA+AA       | Overall         | 4        | 0.959                       | 0.758                       | 1.019 (0.903-1.150) | 1.019 (0.903-1.150) |
| rs10802996           | B VS. A           | Overall         | 2        | 0.726                       | <b>0.000</b>                | 5.013 (3.717-6.762) | 5.003 (3.708-6.751) |
|                      | BB VS. AA         | Overall         | 2        | 0.957                       | 0.354                       | 1.291 (0.753-2.216) | 1.291 (0.752-2.216) |
|                      | BA VS. AA         | Overall         | 2        | 0.981                       | 0.916                       | 0.983 (0.711-1.358) | 0.983 (0.711-1.358) |

|           |             |         |   |       |              |                     |                     |
|-----------|-------------|---------|---|-------|--------------|---------------------|---------------------|
| rs1776148 | BA+BB VS.AA | Overall | 2 | 0.965 | 0.799        | 1.040 (0.770-1.404) | 1.040 (0.770-1.404) |
|           | BB VS.BA+AA | Overall | 2 | 0.953 | 0.331        | 1.299 (0.767-2.200) | 1.299 (0.766-2.200) |
|           | B VS. A     | Overall | 2 | 0.797 | <b>0.000</b> | 1.448 (1.209-1.734) | 1.448 (1.209-1.734) |
|           | BB VS. AA   | Overall | 2 | 0.435 | 0.456        | 1.152 (0.790-1.682) | 1.154 (0.792-1.682) |
|           | BA VS. AA   | Overall | 2 | 0.317 | 0.111        | 1.349 (0.928-1.960) | 1.352 (0.933-1.959) |
|           | BA+BB VS.AA | Overall | 2 | 0.341 | 0.204        | 1.254 (0.879-1.787) | 1.257 (0.883-1.788) |
| rs1776177 | BB VS.BA+AA | Overall | 2 | 0.984 | 0.430        | 0.910 (0.719-1.151) | 0.910 (0.719-1.151) |
|           | B VS. A     | Overall | 3 | 0.994 | <b>0.000</b> | 3.234 (2.815-3.716) | 3.234 (2.815-3.716) |
|           | BB VS. AA   | Overall | 3 | 0.963 | 0.074        | 1.311 (0.974-1.765) | 1.311 (0.974-1.765) |
|           | BA VS. AA   | Overall | 3 | 0.993 | 0.848        | 1.016 (0.861-1.200) | 1.016 (0.861-1.200) |
|           | BA+BB VS.AA | Overall | 3 | 0.998 | 0.489        | 1.058 (0.902-1.241) | 1.058 (0.902-1.241) |
|           | BB VS.BA+AA | Overall | 3 | 0.951 | 0.071        | 1.301 (0.977-1.730) | 1.301 (0.978-1.730) |

**$P_H$** :  $P$  value of Q test for heterogeneity test;  **$P_z$** : means statistically significant ( $P < 0.05$ );  **$P$  (Adjust)**: Multiple testing  $P$  value according to Bonferroni Correction; **LC**:

Lung cancer; **H-B**: Hospital based; **P-B**: Population based; **HWE**: Hardy Weinberg Equilibrium; The bold print of the  $P$  values represents statistically significant

(Before adjustment and after adjustment);  $P$  value less than  $0.05 / (9_{\text{polymorphisms}} * 5_{\text{models}})$  was considered as statistically significant, which was marked with bold font in

the table). **Note**: Heterogeneity was considered to be significant when the  $P$ -value was less than 0.1. If there was no significant heterogeneity, a fixed effect model

(Der-Simonian Laird) was used to evaluate the point estimates and 95%CI; otherwise, a random effects model (Der-Simonian Laird) was used. And the  $P_z$  was

calculated based on the actual model adopted.

**Supplementary table 3.** Details of the sensitivity analyses for the polymorphisms in EXO1 and cancer risk.

| <b>SNP</b>                     | <b>Comparison</b>              | <b>Study omitted</b>           | <b>Estimate</b> | <b>[95% Confident Interval]</b> | <b>Effect Model</b> |
|--------------------------------|--------------------------------|--------------------------------|-----------------|---------------------------------|---------------------|
| rs9350                         | T VS. C                        | Bau et al. (2009)              | 3.060           | 2.095-4.470                     | Random              |
|                                |                                | Wang et al. (2009)             | 3.094           | 1.937-4.942                     |                     |
|                                |                                | Tsai et al. (2009)             | 3.100           | 1.987-4.838                     |                     |
|                                |                                | Ibarrola-Villava et al. (2011) | 2.412           | 2.201-2.643                     |                     |
|                                |                                | Hsu et al. (2009)              | 3.084           | 2.058-4.620                     |                     |
|                                |                                | Combined                       | 2.930           | 2.124-4.042                     |                     |
|                                | TT VS. CC                      | Bau et al. (2009)              | 0.908           | 0.776-1.061                     | Fixed               |
|                                |                                | Wang et al. (2009)             | 0.881           | 0.713-1.089                     |                     |
|                                |                                | Tsai et al. (2009)             | 0.917           | 0.769-1.094                     |                     |
|                                |                                | Ibarrola-Villava et al. (2011) | 0.911           | 0.782-1.062                     |                     |
|                                |                                | Hsu et al. (2009)              | 0.910           | 0.773-1.071                     |                     |
|                                |                                | Combined                       | 0.907           | 0.780-1.055                     |                     |
|                                | TC VS. CC                      | Bau et al. (2009)              | 0.913           | 0.810-1.029                     | Fixed               |
|                                |                                | Wang et al. (2009)             | 0.933           | 0.800-1.087                     |                     |
|                                |                                | Tsai et al. (2009)             | 0.922           | 0.808-1.052                     |                     |
|                                |                                | Ibarrola-Villava et al. (2011) | 0.866           | 0.762-0.983                     |                     |
|                                |                                | Hsu et al. (2009)              | 0.918           | 0.811-1.038                     |                     |
|                                |                                | Combined                       | 0.909           | 0.809-1.020                     |                     |
|                                | TT VS. TC+CC                   | Bau et al. (2009)              | 0.983           | 0.857-1.128                     | Fixed               |
|                                |                                | Wang et al. (2009)             | 0.960           | 0.797-1.158                     |                     |
|                                |                                | Tsai et al. (2009)             | 0.994           | 0.851-1.161                     |                     |
| Ibarrola-Villava et al. (2011) |                                | 0.991                          | 0.866-1.133     |                                 |                     |
| Hsu et al. (2009)              |                                | 0.984                          | 0.853-1.136     |                                 |                     |
| Combined                       |                                | 0.984                          | 0.862-1.124     |                                 |                     |
| TT+TC VS. CC                   | Bau et al. (2009)              | 0.918                          | 0.821-1.027     | Fixed                           |                     |
|                                | Wang et al. (2009)             | 0.929                          | 0.804-1.072     |                                 |                     |
|                                | Tsai et al. (2009)             | 0.928                          | 0.820-1.050     |                                 |                     |
|                                | Ibarrola-Villava et al. (2011) | 0.880                          | 0.782-0.991     |                                 |                     |
|                                | Hsu et al. (2009)              | 0.922                          | 0.821-1.035     |                                 |                     |
|                                | Combined                       | 0.914                          | 0.820-1.019     |                                 |                     |
| rs851797                       | T VS. C                        | Bau et al. (2009)              | 1.840           | 1.680-2.015                     | Fixed               |
|                                |                                | Wang et al. (2009)             | 1.864           | 1.644-2.113                     |                     |
|                                |                                | Tsai et al. (2009)             | 1.830           | 1.651-2.028                     |                     |
|                                |                                | Hsu et al. (2009)              | 1.838           | 1.672-2.021                     |                     |
|                                |                                | Combined                       | 1.841           | 1.686-2.009                     |                     |
|                                | TT VS. CC                      | Bau et al. (2009)              | 0.975           | 0.826-1.150                     | Fixed               |
|                                |                                | Wang et al. (2009)             | 0.987           | 0.785-1.239                     |                     |
|                                |                                | Tsai et al. (2009)             | 0.963           | 0.799-1.160                     |                     |
|                                |                                | Hsu et al. (2009)              | 0.976           | 0.821-1.159                     |                     |
|                                |                                | Combined                       | 0.974           | 0.831-1.142                     |                     |
|                                | TC VS. CC                      | Bau et al. (2009)              | 0.940           | 0.808-1.094                     | Fixed               |



|           |              |                     |       |             |       |
|-----------|--------------|---------------------|-------|-------------|-------|
|           |              | Wang et al. (2009)  | 0.914 | 0.741-1.127 |       |
|           |              | Tsai et al. (2009)  | 0.948 | 0.799-1.125 |       |
|           |              | Hsu et al. (2009)   | 0.942 | 0.805-1.104 |       |
|           |              | Combined            | 0.938 | 0.811-1.086 |       |
|           | TT VS. TC+CC | Bau et al. (2009)   | 1.019 | 0.898-1.155 | Fixed |
|           |              | Wang et al. (2009)  | 1.052 | 0.885-1.250 |       |
|           |              | Tsai et al. (2009)  | 1.000 | 0.868-1.153 |       |
|           |              | Hsu et al. (2009)   | 1.018 | 0.893-1.160 |       |
|           |              | Combined            | 1.019 | 0.903-1.150 |       |
|           | TT+TC VS. CC | Bau et al. (2009)   | 0.953 | 0.826-1.100 | Fixed |
|           |              | Wang et al. (2009)  | 0.941 | 0.772-1.146 |       |
|           |              | Tsai et al. (2009)  | 0.954 | 0.812-1.121 |       |
|           |              | Hsu et al. (2009)   | 0.955 | 0.823-1.108 |       |
|           |              | Combined            | 0.952 | 0.829-1.092 |       |
| rs3754093 | G VS. A      | Bau et al. (2009)   | 2.968 | 2.694-3.271 | Fixed |
|           |              | Wang et al. (2009)  | 3.089 | 2.703-3.530 |       |
|           |              | Tsai et al. (2009)  | 2.925 | 2.622-3.264 |       |
|           |              | Hsu et al. (2009)   | 2.966 | 2.681-3.281 |       |
|           |              | Combined            | 2.976 | 2.711-3.268 |       |
|           | GG VS. AA    | Bau et al. (2009)   | 1.246 | 1.038-1.494 | Fixed |
|           |              | Wang et al. (2009)  | 1.408 | 1.099-1.805 |       |
|           |              | Tsai et al. (2009)  | 1.196 | 0.973-1.470 |       |
|           |              | Hsu et al. (2009)   | 1.237 | 1.023-1.496 |       |
|           |              | Combined            | 1.257 | 1.055-1.497 |       |
|           | GA VS. AA    | Bau et al. (2009)   | 1.096 | 0.968-1.241 | Fixed |
|           |              | Wang et al. (2009)  | 1.093 | 0.920-1.298 |       |
|           |              | Tsai et al. (2009)  | 1.108 | 0.963-1.274 |       |
|           |              | Hsu et al. (2009)   | 1.093 | 0.960-1.244 |       |
|           |              | Combined            | 1.097 | 0.974-1.237 |       |
|           | GG+GA VS. AA | Bau et al. (2009)   | 1.128 | 1.003-1.269 | Fixed |
|           |              | Wang et al. (2009)  | 1.159 | 0.985-1.363 |       |
|           |              | Tsai et al. (2009)  | 1.127 | 0.987-1.287 |       |
|           |              | Hsu et al. (2009)   | 1.124 | 0.995-1.270 |       |
|           |              | Combined            | 1.132 | 1.010-1.267 |       |
|           | GG VS. GA+AA | Bau et al. (2009))  | 1.160 | 0.979-1.374 | Fixed |
|           |              | Wang et al. (2009)) | 1.289 | 1.024-1.622 |       |
|           |              | Tsai et al. (2009)) | 1.114 | 0.919-1.350 |       |
|           |              | Hsu et al. (2009))  | 1.155 | 0.968-1.378 |       |
|           |              | Combined            | 1.168 | 0.992-1.375 |       |
| rs1776177 | G VS. A      | Bau et al. (2009)   | 3.242 | 2.789-3.769 | Fixed |
|           |              | Tsai et al. (2009)  | 3.208 | 2.604-3.951 |       |
|           |              | Hsu et al. (2009)   | 3.242 | 2.747-3.825 |       |
|           |              | Combined            | 3.234 | 2.815-3.716 |       |
|           | GG VS. AA    | Bau et al. (2009)   | 1.306 | 0.947-1.801 | Fixed |

|           |              |                                |       |             |       |
|-----------|--------------|--------------------------------|-------|-------------|-------|
|           |              | Tsai et al. (2009)             | 1.372 | 0.874-2.156 |       |
|           |              | Hsu et al. (2009)              | 1.281 | 0.900-1.823 |       |
|           |              | Combined                       | 1.311 | 0.974-1.765 |       |
|           | GA VS. AA    | Bau et al. (2009)              | 1.019 | 0.851-1.220 | Fixed |
|           |              | Tsai et al. (2009)             | 1.005 | 0.782-1.290 |       |
|           |              | Hsu et al. (2009)              | 1.020 | 0.837-1.244 |       |
|           |              | Combined                       | 1.016 | 0.861-1.200 |       |
|           | GG+GA VS. AA | Bau et al. (2009)              | 1.060 | 0.892-1.260 | Fixed |
|           |              | Tsai et al. (2009)             | 1.054 | 0.829-1.340 |       |
|           |              | Hsu et al. (2009)              | 1.058 | 0.875-1.279 |       |
|           |              | Combined                       | 1.058 | 0.902-1.241 |       |
|           | GG VS. GA+AA | Bau et al. (2009)              | 1.266 | 0.930-1.723 | Fixed |
|           |              | Tsai et al. (2009)             | 1.333 | 0.864-2.057 |       |
|           |              | Hsu et al. (2009)              | 1.242 | 0.885-1.743 |       |
|           |              | Combined                       | 1.272 | 0.956-1.692 |       |
| rs1776148 | G VS. A      | Chang et al. (2008)            | 1.431 | 1.171-1.749 | Fixed |
|           |              | Ibarrola-Villava et al. (2011) | 1.519 | 1.008-2.288 |       |
|           |              | Combined                       | 1.448 | 1.209-1.734 |       |
|           | GG VS. AA    | Chang et al. (2008)            | 1.070 | 0.702-1.631 | Fixed |
|           |              | Ibarrola-Villava et al. (2011) | 1.565 | 0.665-3.686 |       |
|           |              | Combined                       | 1.154 | 0.792-1.682 |       |
|           | GA VS. AA    | Chang et al. (2008)            | 1.228 | 0.810-1.861 | Fixed |
|           |              | Ibarrola-Villava et al. (2011) | 1.985 | 0.854-4.614 |       |
|           |              | Combined                       | 1.352 | 0.933-1.959 |       |
|           | GG+GA VS. AA | Chang et al. (2008)            | 1.151 | 0.776-1.710 | Fixed |
|           |              | Ibarrola-Villava et al. (2011) | 1.777 | 0.798-3.960 |       |
|           |              | Combined                       | 1.257 | 0.883-1.788 |       |
|           | GG VS. GA+AA | Chang et al. (2008)            | 1.494 | 1.136-1.965 | Fixed |
|           |              | Ibarrola-Villava et al. (2011) | 0.957 | 0.559-1.637 |       |
|           |              | Combined                       | 1.362 | 1.067-1.738 |       |
| rs1635517 | T VS. C      | Bau et al. (2009)              | 1.130 | 1.018-1.254 | Fixed |
|           |              | Wang et al. (2009)             | 1.091 | 0.945-1.259 |       |
|           |              | Tsai et al. (2009)             | 1.142 | 1.016-1.285 |       |
|           |              | Hsu et al. (2009)              | 1.135 | 1.018-1.265 |       |
|           |              | Combined                       | 1.128 | 1.020-1.247 |       |
|           | TT VS. CC    | Bau et al. (2009)              | 0.811 | 0.612-1.074 | Fixed |
|           |              | Wang et al. (2009)             | 0.651 | 0.449-0.946 |       |
|           |              | Tsai et al. (2009)             | 0.862 | 0.626-1.186 |       |
|           |              | Hsu et al. (2009)              | 0.836 | 0.624-1.122 |       |
|           |              | Combined                       | 0.799 | 0.610-1.045 |       |
|           | TC VS. CC    | Bau et al. (2009)              | 0.933 | 0.699-1.246 | Fixed |
|           |              | Wang et al. (2009)             | 0.782 | 0.533-1.148 |       |
|           |              | Tsai et al. (2009)             | 0.979 | 0.705-1.359 |       |
|           |              | Hsu et al. (2009)              | 0.958 | 0.708-1.295 |       |

|            |              |                    |       |             |       |
|------------|--------------|--------------------|-------|-------------|-------|
|            |              | Combined           | 0.922 | 0.699-1.216 |       |
|            | TT+TC VS. CC | Bau et al. (2009)  | 0.852 | 0.646-1.125 | Fixed |
|            |              | Wang et al. (2009) | 0.696 | 0.481-1.005 |       |
|            |              | Tsai et al. (2009) | 0.902 | 0.658-1.236 |       |
|            |              | Hsu et al. (2009)  | 0.877 | 0.656-1.172 |       |
|            |              | Combined           | 0.840 | 0.644-1.096 |       |
|            | TT VS. TC+CC | Bau et al. (2009)  | 0.946 | 0.839-1.067 | Fixed |
|            |              | Wang et al. (2009) | 0.920 | 0.779-1.086 |       |
|            |              | Tsai et al. (2009) | 0.952 | 0.832-1.090 |       |
|            |              | Hsu et al. (2009)  | 0.949 | 0.837-1.075 |       |
|            |              | Combined           | 0.944 | 0.841-1.060 |       |
| rs1635498  | G VS. A      | Bau et al. (2009)  | 7.944 | 6.868-9.189 | Fixed |
|            |              | Wang et al. (2009) | 8.182 | 6.711-9.976 |       |
|            |              | Tsai et al. (2009) | 7.929 | 6.726-9.348 |       |
|            |              | Hsu et al. (2009)  | 7.898 | 6.786-9.192 |       |
|            |              | Combined           | 7.967 | 6.926-9.164 |       |
|            | GG VS. AA    | Bau et al. (2009)  | 1.080 | 0.664-1.758 | Fixed |
|            |              | Wang et al. (2009) | 1.317 | 0.706-2.458 |       |
|            |              | Tsai et al. (2009) | 1.096 | 0.633-1.898 |       |
|            |              | Hsu et al. (2009)  | 1.016 | 0.609-1.693 |       |
|            |              | Combined           | 1.106 | 0.696-1.758 |       |
|            | GA VS. AA    | Bau et al. (2009)  | 1.065 | 0.928-1.223 | Fixed |
|            |              | Wang et al. (2009) | 1.120 | 0.926-1.354 |       |
|            |              | Tsai et al. (2009) | 1.054 | 0.901-1.232 |       |
|            |              | Hsu et al. (2009)  | 1.064 | 0.921-1.229 |       |
|            |              | Combined           | 1.071 | 0.937-1.223 |       |
|            | GG+GA VS. AA | Bau et al. (2009)  | 1.066 | 0.931-1.220 | Fixed |
|            |              | Wang et al. (2009) | 1.133 | 0.941-1.363 |       |
|            |              | Tsai et al. (2009) | 1.056 | 0.907-1.230 |       |
|            |              | Hsu et al. (2009)  | 1.061 | 0.922-1.221 |       |
|            |              | Combined           | 1.073 | 0.942-1.222 |       |
|            | GG VS. GA+AA | Bau et al. (2009)  | 1.062 | 0.653-1.727 | Fixed |
|            |              | Wang et al. (2009) | 1.277 | 0.686-2.380 |       |
|            |              | Tsai et al. (2009) | 1.079 | 0.624-1.867 |       |
|            |              | Hsu et al. (2009)  | 1.000 | 0.600-1.664 |       |
|            |              | Combined           | 1.085 | 0.683-1.724 |       |
| rs10802996 | G VS. C      | Luo et al. (2012)  | 4.781 | 3.206-7.130 | Fixed |
|            |              | Bau et al. (2009)  | 5.326 | 3.391-8.363 |       |
|            |              | Combined           | 5.003 | 3.708-6.751 |       |
|            | GG VS. CC    | Luo et al. (2012)  | 1.275 | 0.625-2.601 | Fixed |
|            |              | Bau et al. (2009)  | 1.314 | 0.575-3.001 |       |
|            |              | Combined           | 1.291 | 0.752-2.216 |       |
|            | GC VS. CC    | Luo et al. (2012)  | 0.987 | 0.628-1.550 | Fixed |
|            |              | Bau et al. (2009)  | 0.979 | 0.616-1.554 |       |

|           |              |                                |       |             |        |
|-----------|--------------|--------------------------------|-------|-------------|--------|
|           |              | Combined                       | 0.983 | 0.711-1.358 |        |
|           | GG+GC VS. CC | Luo et al. (2012)              | 1.046 | 0.689-1.589 | Fixed  |
|           |              | Bau et al. (2009)              | 1.033 | 0.670-1.591 |        |
|           |              | Combined                       | 1.040 | 0.770-1.404 |        |
|           | GG VS. GC+CC | Luo et al. (2012)              | 1.250 | 0.626-2.498 | Fixed  |
|           |              | Bau et al. (2009)              | 0.588 | 0.264-1.309 |        |
|           |              | Combined                       | 0.900 | 0.538-1.507 |        |
| rs1047840 | G VS. A      | Nogueira et al. (2014)         | 4.274 | 3.062-5.965 | Random |
|           |              | Tang et al. (2014)             | 4.270 | 3.056-5.967 |        |
|           |              | Luo et al. (2012)              | 3.914 | 2.847-5.381 |        |
|           |              | Tsai et al. (2009)             | 3.833 | 2.837-5.179 |        |
|           |              | Wang et al. (2009)             | 3.867 | 2.877-5.198 |        |
|           |              | Bau et al. (2009)              | 3.888 | 2.832-5.337 |        |
|           |              | Zienolddiny et al. (2005)      | 4.204 | 3.021-5.850 |        |
|           |              | Hsu et al. (2009)              | 3.886 | 2.830-5.336 |        |
|           |              | Bayram et al. (2011)           | 4.116 | 2.960-5.723 |        |
|           |              | Chang et al. (2008)            | 4.357 | 3.172-5.986 |        |
|           |              | Ibarrola-Villava et al. (2011) | 4.340 | 3.137-6.004 |        |
|           |              | Combined                       | 4.082 | 3.009-5.538 |        |
|           | GG VS. AA    | Nogueira et al. (2014)         | 1.456 | 0.984-2.154 | Random |
|           |              | Tang et al. (2014)             | 1.471 | 0.961-2.250 |        |
|           |              | Luo et al. (2012)              | 1.334 | 0.937-1.900 |        |
|           |              | Tsai et al. (2009)             | 1.225 | 0.894-1.679 |        |
|           |              | Wang et al. (2009)             | 1.322 | 0.918-1.905 |        |
|           |              | Bau et al. (2009)              | 1.317 | 0.926-1.872 |        |
|           |              | Zienolddiny et al. (2005)      | 1.411 | 0.965-2.063 |        |
|           |              | Hsu et al. (2009)              | 1.324 | 0.925-1.896 |        |
|           |              | Bayram et al. (2011)           | 1.320 | 0.920-1.893 |        |
|           |              | Chang et al. (2008)            | 1.529 | 1.089-2.149 |        |
|           |              | Ibarrola-Villava et al. (2011) | 1.504 | 1.034-2.188 |        |
|           |              | Combined                       | 1.379 | 0.977-1.948 |        |
|           | GA VS. AA    | Nogueira et al. (2014)         | 1.104 | 0.884-1.378 | Random |
|           |              | Tang et al. (2014)             | 1.117 | 0.895-1.394 |        |
|           |              | Luo et al. (2012)              | 1.054 | 0.855-1.299 |        |
|           |              | Tsai et al. (2009)             | 1.042 | 0.851-1.277 |        |
|           |              | Wang et al. (2009)             | 1.057 | 0.848-1.318 |        |
|           |              | Bau et al. (2009)              | 1.059 | 0.858-1.307 |        |
|           |              | Zienolddiny et al. (2005)      | 1.134 | 0.919-1.398 |        |
|           |              | Hsu et al. (2009)              | 1.055 | 0.853-1.306 |        |
|           |              | Bayram et al. (2011)           | 1.109 | 0.894-1.376 |        |
|           |              | Chang et al. (2008)            | 1.165 | 0.965-1.406 |        |
|           |              | Ibarrola-Villava et al. (2011) | 1.108 | 0.888-1.382 |        |
|           |              | Combined                       | 1.091 | 0.892-1.336 |        |
|           | GG+GA VS. AA | Nogueira et al. (2014)         | 1.150 | 0.910-1.453 | Random |

|              |                                |       |             |        |
|--------------|--------------------------------|-------|-------------|--------|
|              | Tang et al. (2014)             | 1.160 | 0.917-1.467 |        |
|              | Luo et al. (2012)              | 1.092 | 0.875-1.363 |        |
|              | Tsai et al. (2009)             | 1.076 | 0.872-1.327 |        |
|              | Wang et al. (2009)             | 1.098 | 0.868-1.389 |        |
|              | Bau et al. (2009)              | 1.093 | 0.875-1.365 |        |
|              | Zienolddiny et al. (2005)      | 1.169 | 0.933-1.465 |        |
|              | Hsu et al. (2009)              | 1.094 | 0.873-1.371 |        |
|              | Bayram et al. (2011)           | 1.136 | 0.903-1.430 |        |
|              | Chang et al. (2008)            | 1.219 | 0.998-1.489 |        |
|              | Ibarrola-Villava et al. (2011) | 1.163 | 0.924-1.464 |        |
|              | Combined                       | 1.132 | 0.914-1.401 |        |
| GG VS. GA+AA | Nogueira et al. (2014)         | 1.422 | 1.077-1.877 | Random |
|              | Tang et al. (2014)             | 1.436 | 1.098-1.877 |        |
|              | Luo et al. (2012)              | 1.366 | 1.058-1.762 |        |
|              | Tsai et al. (2009)             | 1.224 | 0.993-1.509 |        |
|              | Wang et al. (2009)             | 1.306 | 1.008-1.692 |        |
|              | Bau et al. (2009)              | 1.315 | 1.026-1.686 |        |
|              | Zienolddiny et al. (2005)      | 1.378 | 1.050-1.808 |        |
|              | Hsu et al. (2009)              | 1.318 | 1.022-1.700 |        |
|              | Bayram et al. (2011)           | 1.294 | 1.008-1.660 |        |
|              | Chang et al. (2008)            | 1.418 | 1.101-1.827 |        |
|              | Ibarrola-Villava et al. (2011) | 1.381 | 1.039-1.836 |        |
|              | Combined                       | 1.349 | 1.055-1.724 |        |

---

**Supplementary table 4.** *P* values of the Egger's test for the polymorphisms in EXO1.

| Polymorphism | Subgroup  | Egger's test  |
|--------------|-----------|---------------|
|              |           | <i>P</i> >  t |
| rs1047840    | Overall   | 0.337         |
|              | Asian     | 0.957         |
|              | Caucasian | 0.816         |
|              | PCR-RFLP  | 0.566         |
|              | H-B       | 0.371         |
| rs9350       | Overall   | 0.430         |
|              | Asian     | 0.572         |
|              | PCR-RFLP  | 0.722         |
| rs851797     | Overall   | 0.406         |
| rs3754093    | Overall   | 0.349         |
| rs1776177    | Overall   | 0.142         |
| rs1635517    | Overall   | 0.310         |
| rs1635498    | Overall   | 0.145         |

PCR-RFLP: polymerase chain reaction-restriction fragment length polymorphism; H-B:

hospital-based.

**Supplementary table 5.** Details of the linkage disequilibrium analysis for EXO1 polymorphisms in populations from 1000 genomes Phase 3.

| <b>L1</b>  | <b>L2</b> | <b>D'</b> | <b>LOD</b> | <b>r<sup>2</sup></b> | <b>CI-low</b> | <b>CI-hi</b> | <b>Distance</b> |
|------------|-----------|-----------|------------|----------------------|---------------|--------------|-----------------|
| <b>ASW</b> |           |           |            |                      |               |              |                 |
| rs1635517  | rs1776177 | 1.000     | 5.390      | 0.316                | 0.690         | 1.000        | 116             |
| rs1635517  | rs1047840 | 0.378     | 0.470      | 0.048                | 0.050         | 0.700        | 30268           |
| rs1635517  | rs1776148 | 0.326     | 0.800      | 0.064                | 0.070         | 0.580        | 30512           |
| rs1635517  | rs1635498 | 0.256     | 0.340      | 0.031                | 0.030         | 0.590        | 33242           |
| rs1635517  | rs9350    | 0.687     | 0.670      | 0.042                | 0.110         | 0.910        | 36641           |
| rs1776177  | rs1047840 | 0.119     | 0.190      | 0.014                | 0.000         | 0.340        | 30152           |
| rs1776177  | rs1776148 | 0.251     | 0.400      | 0.035                | 0.030         | 0.530        | 30396           |
| rs1776177  | rs1635498 | 0.416     | 0.270      | 0.029                | 0.040         | 0.790        | 33126           |
| rs1776177  | rs9350    | 0.511     | 0.890      | 0.078                | 0.110         | 0.790        | 36525           |
| rs1047840  | rs1776148 | 0.085     | 0.050      | 0.004                | 0.000         | 0.400        | 244             |
| rs1047840  | rs1635498 | 0.587     | 0.840      | 0.058                | 0.120         | 0.850        | 2974            |
| rs1047840  | rs9350    | 0.210     | 0.080      | 0.008                | 0.020         | 0.680        | 6373            |
| rs1776148  | rs1635498 | 0.311     | 0.310      | 0.030                | 0.030         | 0.660        | 2730            |
| rs1776148  | rs9350    | 0.722     | 0.900      | 0.086                | 0.150         | 0.920        | 6129            |
| rs1635498  | rs9350    | 1.000     | 0.930      | 0.051                | 0.140         | 0.990        | 3399            |
| <b>CEU</b> |           |           |            |                      |               |              |                 |
| rs1776177  | rs1047840 | 0.537     | 5.240      | 0.170                | 0.350         | 0.680        | 30152           |
| rs1776177  | rs1776148 | 0.633     | 6.450      | 0.211                | 0.440         | 0.770        | 30396           |
| rs1776177  | rs1635498 | 1.000     | 1.200      | 0.022                | 0.200         | 1.000        | 33126           |
| rs1776177  | rs9350    | 0.046     | 0.010      | 0.000                | 0.000         | 0.400        | 36525           |
| rs1047840  | rs1776148 | 0.128     | 0.410      | 0.015                | 0.010         | 0.290        | 244             |
| rs1047840  | rs1635498 | 0.599     | 0.510      | 0.013                | 0.080         | 0.890        | 2974            |
| rs1047840  | rs9350    | 0.506     | 2.440      | 0.091                | 0.240         | 0.700        | 6373            |
| rs1776148  | rs1635498 | 0.266     | 0.030      | 0.001                | 0.030         | 0.850        | 2730            |
| rs1776148  | rs9350    | 0.397     | 0.560      | 0.017                | 0.060         | 0.690        | 6129            |
| rs1635498  | rs9350    | 0.651     | 0.030      | 0.002                | 0.040         | 0.960        | 3399            |
| <b>CHD</b> |           |           |            |                      |               |              |                 |
| rs1635517  | rs1776177 | 1.000     | 14.940     | 0.634                | 0.870         | 1.000        | 116             |
| rs1635517  | rs1047840 | 0.248     | 0.960      | 0.059                | 0.060         | 0.440        | 30268           |
| rs1635517  | rs1776148 | 0.014     | 0.000      | 0.000                | -0.010        | 0.250        | 30512           |
| rs1635517  | rs1635498 | 0.669     | 3.920      | 0.246                | 0.400         | 0.840        | 33242           |
| rs1635517  | rs9350    | 0.698     | 1.470      | 0.070                | 0.230         | 0.890        | 36641           |
| rs1776177  | rs1047840 | 0.286     | 0.970      | 0.054                | 0.070         | 0.490        | 30152           |
| rs1776177  | rs1776148 | 0.291     | 1.140      | 0.061                | 0.080         | 0.490        | 30396           |
| rs1776177  | rs1635498 | 0.604     | 2.140      | 0.127                | 0.270         | 0.810        | 33126           |
| rs1776177  | rs9350    | 0.600     | 1.570      | 0.082                | 0.220         | 0.810        | 36525           |
| rs1047840  | rs1776148 | 0.212     | 0.740      | 0.041                | 0.040         | 0.400        | 244             |
| rs1047840  | rs1635498 | 0.383     | 1.050      | 0.077                | 0.100         | 0.630        | 2974            |

|           |           |       |       |       |       |       |      |
|-----------|-----------|-------|-------|-------|-------|-------|------|
| rs1047840 | rs9350    | 0.533 | 0.800 | 0.041 | 0.110 | 0.800 | 6373 |
| rs1776148 | rs1635498 | 1.000 | 0.450 | 0.021 | 0.080 | 0.980 | 2730 |
| rs1776148 | rs9350    | 1.000 | 4.420 | 0.165 | 0.660 | 1.000 | 6129 |
| rs1635498 | rs9350    | 1.000 | 2.080 | 0.074 | 0.380 | 1.000 | 3399 |

**GIH**

|           |           |       |        |       |       |       |       |
|-----------|-----------|-------|--------|-------|-------|-------|-------|
| rs1635517 | rs1776177 | 1.000 | 16.850 | 0.531 | 0.890 | 1.000 | 116   |
| rs1635517 | rs1047840 | 0.391 | 1.630  | 0.093 | 0.150 | 0.580 | 30268 |
| rs1635517 | rs1776148 | 0.298 | 1.960  | 0.086 | 0.130 | 0.440 | 30512 |
| rs1635517 | rs1635498 | 0.226 | 0.120  | 0.006 | 0.020 | 0.650 | 33242 |
| rs1635517 | rs9350    | 0.190 | 0.130  | 0.007 | 0.010 | 0.550 | 36641 |
| rs1776177 | rs1047840 | 0.632 | 3.030  | 0.132 | 0.350 | 0.800 | 30152 |
| rs1776177 | rs1776148 | 0.544 | 4.160  | 0.167 | 0.340 | 0.700 | 30396 |
| rs1776177 | rs1635498 | 0.035 | 0.000  | 0.000 | 0.000 | 0.500 | 33126 |
| rs1776177 | rs9350    | 0.078 | 0.060  | 0.002 | 0.000 | 0.350 | 36525 |
| rs1047840 | rs1776148 | 0.177 | 0.470  | 0.018 | 0.020 | 0.370 | 244   |
| rs1047840 | rs1635498 | 0.236 | 0.040  | 0.002 | 0.020 | 0.830 | 2974  |
| rs1047840 | rs9350    | 0.110 | 0.030  | 0.001 | 0.010 | 0.540 | 6373  |
| rs1776148 | rs1635498 | 1.000 | 1.660  | 0.069 | 0.290 | 1.000 | 2730  |
| rs1776148 | rs9350    | 0.914 | 5.230  | 0.177 | 0.630 | 0.980 | 6129  |
| rs1635498 | rs9350    | 1.000 | 0.900  | 0.023 | 0.140 | 0.990 | 3399  |

**CHB**

|           |           |       |        |       |       |       |       |
|-----------|-----------|-------|--------|-------|-------|-------|-------|
| rs1635517 | rs1776177 | 1.000 | 14.980 | 0.570 | 0.870 | 1.000 | 116   |
| rs1635517 | rs1047840 | 0.273 | 1.130  | 0.062 | 0.070 | 0.460 | 30268 |
| rs1635517 | rs1776148 | 0.170 | 0.020  | 0.002 | 0.020 | 0.810 | 30512 |
| rs1635517 | rs1635498 | 0.511 | 4.010  | 0.214 | 0.310 | 0.670 | 33242 |
| rs1635517 | rs9350    | 0.599 | 1.680  | 0.067 | 0.230 | 0.810 | 36641 |
| rs1776177 | rs1047840 | 0.229 | 0.710  | 0.037 | 0.040 | 0.430 | 30152 |
| rs1776177 | rs1776148 | 0.445 | 2.230  | 0.104 | 0.200 | 0.640 | 30396 |
| rs1776177 | rs1635498 | 0.445 | 1.870  | 0.096 | 0.180 | 0.650 | 33126 |
| rs1776177 | rs9350    | 0.653 | 3.910  | 0.133 | 0.400 | 0.810 | 36525 |
| rs1047840 | rs1776148 | 0.195 | 0.400  | 0.028 | 0.020 | 0.420 | 244   |
| rs1047840 | rs1635498 | 0.407 | 1.960  | 0.113 | 0.170 | 0.600 | 2974  |
| rs1047840 | rs9350    | 0.326 | 0.590  | 0.024 | 0.050 | 0.600 | 6373  |
| rs1776148 | rs1635498 | 1.000 | 0.840  | 0.043 | 0.130 | 0.990 | 2730  |
| rs1776148 | rs9350    | 0.898 | 4.270  | 0.135 | 0.580 | 0.970 | 6129  |
| rs1635498 | rs9350    | 1.000 | 5.150  | 0.154 | 0.690 | 1.000 | 3399  |

**JPT**

|           |           |       |        |       |       |       |       |
|-----------|-----------|-------|--------|-------|-------|-------|-------|
| rs1635517 | rs1776177 | 1.000 | 15.520 | 0.557 | 0.880 | 1.000 | 116   |
| rs1635517 | rs1047840 | 0.112 | 0.260  | 0.011 | 0.000 | 0.300 | 30268 |
| rs1635517 | rs1776148 | 0.216 | 0.750  | 0.038 | 0.040 | 0.400 | 30512 |
| rs1635517 | rs1635498 | 0.669 | 3.580  | 0.227 | 0.400 | 0.830 | 33242 |
| rs1635517 | rs9350    | 0.803 | 2.850  | 0.156 | 0.440 | 0.930 | 36641 |
| rs1776177 | rs1047840 | 0.408 | 1.920  | 0.083 | 0.170 | 0.600 | 30152 |
| rs1776177 | rs1776148 | 0.569 | 3.290  | 0.149 | 0.320 | 0.740 | 30396 |



|           |           |       |       |       |       |       |       |
|-----------|-----------|-------|-------|-------|-------|-------|-------|
| rs1776177 | rs1635498 | 0.633 | 2.070 | 0.112 | 0.280 | 0.830 | 33126 |
| rs1776177 | rs9350    | 0.579 | 2.870 | 0.145 | 0.310 | 0.750 | 36525 |
| rs1047840 | rs1776148 | 0.539 | 5.720 | 0.263 | 0.360 | 0.680 | 244   |
| rs1047840 | rs1635498 | 0.020 | 0.000 | 0.000 | 0.000 | 0.310 | 2974  |
| rs1047840 | rs9350    | 0.707 | 2.310 | 0.109 | 0.340 | 0.880 | 6373  |
| rs1776148 | rs1635498 | 1.000 | 1.410 | 0.048 | 0.240 | 1.000 | 2730  |
| rs1776148 | rs9350    | 1.000 | 6.860 | 0.204 | 0.760 | 1.000 | 6129  |
| rs1635498 | rs9350    | 1.000 | 1.430 | 0.122 | 0.240 | 1.000 | 3399  |

**LWK**

|           |           |       |       |       |       |       |       |
|-----------|-----------|-------|-------|-------|-------|-------|-------|
| rs1635517 | rs1776177 | 1.000 | 8.560 | 0.283 | 0.810 | 1.000 | 116   |
| rs1635517 | rs1047840 | 0.014 | 0.000 | 0.000 | 0.000 | 0.360 | 30268 |
| rs1635517 | rs1776148 | 0.294 | 1.790 | 0.074 | 0.120 | 0.450 | 30512 |
| rs1635517 | rs1635498 | 0.331 | 0.390 | 0.021 | 0.040 | 0.660 | 33242 |
| rs1635517 | rs9350    | 0.293 | 0.110 | 0.008 | 0.030 | 0.760 | 36641 |
| rs1776177 | rs1047840 | 0.056 | 0.030 | 0.001 | 0.000 | 0.350 | 30152 |
| rs1776177 | rs1776148 | 0.521 | 1.510 | 0.066 | 0.190 | 0.740 | 30396 |
| rs1776177 | rs1635498 | 1.000 | 0.590 | 0.055 | 0.090 | 0.980 | 33126 |
| rs1776177 | rs9350    | 0.369 | 0.860 | 0.042 | 0.080 | 0.620 | 36525 |
| rs1047840 | rs1776148 | 0.094 | 0.160 | 0.007 | 0.000 | 0.290 | 244   |
| rs1047840 | rs1635498 | 0.386 | 0.650 | 0.028 | 0.070 | 0.680 | 2974  |
| rs1047840 | rs9350    | 0.174 | 0.220 | 0.010 | 0.010 | 0.460 | 6373  |
| rs1776148 | rs1635498 | 0.359 | 0.730 | 0.029 | 0.070 | 0.640 | 2730  |
| rs1776148 | rs9350    | 1.000 | 2.810 | 0.076 | 0.500 | 1.000 | 6129  |
| rs1635498 | rs9350    | 0.478 | 0.050 | 0.004 | 0.040 | 0.960 | 3399  |

**MEX**

|           |           |       |       |       |       |       |       |
|-----------|-----------|-------|-------|-------|-------|-------|-------|
| rs1776177 | rs1047840 | 0.099 | 0.040 | 0.003 | 0.000 | 0.470 | 30152 |
| rs1776177 | rs1776148 | 0.886 | 3.970 | 0.218 | 0.550 | 0.970 | 30396 |
| rs1776177 | rs1635498 | 1.000 | 0.500 | 0.017 | 0.080 | 0.980 | 33126 |
| rs1776177 | rs9350    | 0.197 | 0.240 | 0.013 | 0.020 | 0.490 | 36525 |
| rs1047840 | rs1776148 | 0.126 | 0.180 | 0.013 | 0.010 | 0.370 | 244   |
| rs1047840 | rs1635498 | 1.000 | 1.090 | 0.053 | 0.170 | 0.990 | 2974  |
| rs1047840 | rs9350    | 0.170 | 0.090 | 0.005 | 0.010 | 0.560 | 6373  |
| rs1776148 | rs1635498 | 1.000 | 0.270 | 0.008 | 0.050 | 0.980 | 2730  |
| rs1776148 | rs9350    | 1.000 | 3.640 | 0.154 | 0.590 | 1.000 | 6129  |
| rs1635498 | rs9350    | 1.000 | 0.320 | 0.010 | 0.060 | 0.980 | 3399  |

**TSI**

|           |           |       |        |       |       |       |       |
|-----------|-----------|-------|--------|-------|-------|-------|-------|
| rs1635517 | rs1776177 | 1.000 | 23.250 | 0.707 | 0.920 | 1.000 | 116   |
| rs1635517 | rs1047840 | 0.149 | 0.270  | 0.013 | 0.010 | 0.370 | 30268 |
| rs1635517 | rs1776148 | 0.489 | 3.640  | 0.176 | 0.290 | 0.640 | 30512 |
| rs1635517 | rs1635498 | 0.140 | 0.020  | 0.001 | 0.020 | 0.730 | 33242 |
| rs1635517 | rs9350    | 0.037 | 0.000  | 0.000 | 0.000 | 0.550 | 36641 |
| rs1776177 | rs1047840 | 0.351 | 1.050  | 0.052 | 0.090 | 0.570 | 30152 |
| rs1776177 | rs1776148 | 0.791 | 7.730  | 0.324 | 0.600 | 0.900 | 30396 |
| rs1776177 | rs1635498 | 1.000 | 1.140  | 0.027 | 0.180 | 0.990 | 33126 |

|            |           |       |        |       |        |       |       |
|------------|-----------|-------|--------|-------|--------|-------|-------|
| rs1776177  | rs9350    | 0.083 | 0.020  | 0.001 | 0.010  | 0.530 | 36525 |
| rs1047840  | rs1776148 | 0.278 | 1.280  | 0.063 | 0.080  | 0.450 | 244   |
| rs1047840  | rs1635498 | 0.631 | 0.600  | 0.025 | 0.100  | 0.900 | 2974  |
| rs1047840  | rs9350    | 0.250 | 0.350  | 0.018 | 0.030  | 0.550 | 6373  |
| rs1776148  | rs1635498 | 0.642 | 0.650  | 0.021 | 0.100  | 0.900 | 2730  |
| rs1776148  | rs9350    | 1.000 | 2.360  | 0.077 | 0.430  | 1.000 | 6129  |
| rs1635498  | rs9350    | 1.000 | 0.280  | 0.004 | 0.060  | 0.980 | 3399  |
| <b>YRI</b> |           |       |        |       |        |       |       |
| rs1635517  | rs1776177 | 1.000 | 18.490 | 0.326 | 0.890  | 1.000 | 116   |
| rs1635517  | rs1047840 | 0.155 | 0.280  | 0.007 | 0.010  | 0.380 | 30268 |
| rs1635517  | rs1776148 | 0.429 | 5.290  | 0.144 | 0.280  | 0.560 | 30512 |
| rs1635517  | rs1635498 | 0.713 | 8.160  | 0.223 | 0.510  | 0.850 | 33242 |
| rs1635517  | rs9350    | 0.755 | 3.250  | 0.060 | 0.430  | 0.900 | 36641 |
| rs1776177  | rs1047840 | 0.274 | 2.240  | 0.054 | 0.120  | 0.410 | 30152 |
| rs1776177  | rs1776148 | 0.567 | 5.760  | 0.137 | 0.380  | 0.710 | 30396 |
| rs1776177  | rs1635498 | 0.762 | 3.840  | 0.081 | 0.460  | 0.900 | 33126 |
| rs1776177  | rs9350    | 0.747 | 8.160  | 0.180 | 0.550  | 0.870 | 36525 |
| rs1047840  | rs1776148 | 0.033 | 0.030  | 0.001 | -0.010 | 0.220 | 244   |
| rs1047840  | rs1635498 | 0.913 | 5.370  | 0.112 | 0.630  | 0.980 | 2974  |
| rs1047840  | rs9350    | 0.786 | 6.400  | 0.143 | 0.560  | 0.900 | 6373  |
| rs1776148  | rs1635498 | 0.426 | 2.390  | 0.061 | 0.200  | 0.620 | 2730  |
| rs1776148  | rs9350    | 1.000 | 8.220  | 0.137 | 0.800  | 1.000 | 6129  |
| rs1635498  | rs9350    | 1.000 | 3.180  | 0.045 | 0.560  | 1.000 | 3399  |

Population descriptors: ASW: African ancestry in Southwest USA, CEU: Utah residents with Northern and Western European ancestry from the CEPH collection, CHB: Han Chinese in Beijing, China, CHD: Chinese in Metropolitan Denver, Colorado, GIH: Gujarati Indians in Houston, Texas, JPT: Japanese in Tokyo, Japan, LWK: Luhya in Webuye, Kenya, MEX: Mexican ancestry in Los Angeles, California, MKK: Maasai in Kinyawa, Kenya, TSI: Tuscans in Italy, YRI: Yoruba in Ibadan, Nigeria. The linkage disequilibrium values were calculated using  $r^2$  and  $D'$  statistic; CI (Confidence Interval); LOD: Log odds score.

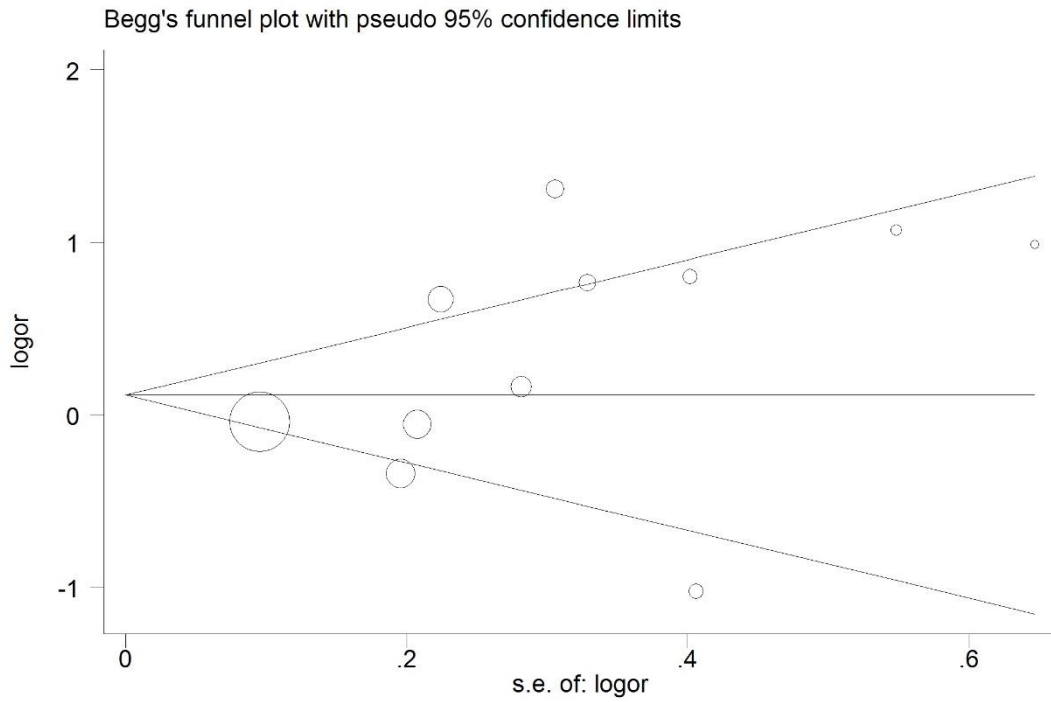

**Supplementary figure 1.** Begg's funnel plot for publication bias test under EXO1 rs1047840 polymorphism

(allelic comparison G vs. A). The x-axis is log (OR), and the y-axis is natural logarithm of OR. The horizontal line in the figure represents the overall estimated log (OR). The two diagonal lines indicate the pseudo 95% confidence limits of the effect estimate. Log (OR) =log-transformed OR, OR=odds ratio.
